# Supplementary material for: Theoretical Food and Nutrient Composition of Whole-Food Plant-Based and Vegan Diets Compared to Current Dietary Recommendations
Source: MDPI journal article supplement (doi:10.3390/nu11030625), 2019-03-14
Supplement: s1 [file s1]

# Theoretical Food and Nutrient Composition of Whole-Food Plant Based and Vegan Diets Compared to Current Dietary Recommendations

## Supplementary Materials:

**Table S1. HEI–2015<sup>1</sup> Components & Scoring Standards**  
(<https://epi.grants.cancer.gov/hei/developing.html>).

| Component                              | Maximum | Standard for maximum      | Standard for minimum score of |
|----------------------------------------|---------|---------------------------|-------------------------------|
| <b>Adequacy:</b>                       |         |                           |                               |
| <b>Total Fruits<sup>2</sup></b>        | 5       | ≥0.8 cup equiv. per 1,000 | No Fruit                      |
| <b>Whole Fruits<sup>3</sup></b>        | 5       | ≥0.4 cup equiv. per 1,000 | No Whole Fruit                |
| <b>Total Vegetables<sup>4</sup></b>    | 5       | ≥1.1 cup equiv. per 1,000 | No Vegetables                 |
| <b>Greens and Beans<sup>4</sup></b>    | 5       | ≥0.2 cup equiv. per 1,000 | No Dark Green Vegetables or   |
| <b>Whole Grains</b>                    | 10      | ≥1.5 oz equiv. per 1,000  | No Whole Grains               |
| <b>Dairy<sup>5</sup></b>               | 10      | ≥1.3 cup equiv. per 1,000 | No Dairy                      |
| <b>Total Protein Foods<sup>6</sup></b> | 5       | ≥2.5 oz equiv. per 1,000  | No Protein Foods              |
| <b>Seafood and Plant</b>               | 5       | ≥0.8 oz equiv. per 1,000  | No Seafood or Plant Proteins  |
| <b>Fatty Acids<sup>8</sup></b>         | 10      | (PUFAs + MUFAs)/SFAs      | (PUFAs + MUFAs)/SFAs ≤1.2     |
| <b>Moderation:</b>                     |         |                           |                               |
| <b>Refined Grains</b>                  | 10      | ≤1.8 oz equiv. per 1,000  | ≥4.3 oz equiv. per 1,000 kcal |
| <b>Sodium</b>                          | 10      | ≤1.1 gram per 1,000 kcal  | ≥2.0 grams per 1,000 kcal     |
| <b>Added Sugars</b>                    | 10      | ≤6.5% of energy           | ≥26% of energy                |
| <b>Saturated Fats</b>                  | 10      | ≤8% of energy             | ≥16% of energy                |

<sup>1</sup> Intakes between the minimum and maximum standards are scored proportionately.

<sup>2</sup> Includes 100% fruit juice.

<sup>3</sup> Includes all forms except juice.

<sup>4</sup> Includes legumes (beans and peas).

<sup>5</sup> Includes all milk products, such as fluid milk, yogurt, and cheese, and fortified soy beverages.

<sup>6</sup> Includes legumes (beans and peas).

<sup>7</sup> Includes seafood, nuts, seeds, soy products (other than beverages), and legumes (beans and peas).

<sup>8</sup> Ratio of poly- and monounsaturated fatty acids (PUFAs and MUFAs) to saturated fatty acids (SFAs).

**Table S2. Comparison of Food Intakes and Diet Quality for Theoretical Vegan<sup>1,2</sup> Meal Plans Compared to MyPlate<sup>2</sup>**

|                            | <b>MyPlate</b> |           | <b>Vegan</b> |           | <b>% diff. vs. MP<sup>3</sup></b> |
|----------------------------|----------------|-----------|--------------|-----------|-----------------------------------|
| <b>Food Group Servings</b> | <b>Mean</b>    | <b>SD</b> | <b>Mean</b>  | <b>SD</b> |                                   |

|                              |     |     |     |     |      |
|------------------------------|-----|-----|-----|-----|------|
| Total vegetables (cup)       | 2.5 | 0.9 | 7.1 | 2.8 | +184 |
| Green leafy vegetables (cup) | 0.8 | 0.7 | 2.8 | 1.9 | +250 |
| Legumes (cup)                | 0.5 | 0.6 | 2.9 | 1.4 | +480 |
| Whole fruits (cup)           | 1.1 | 0.6 | 2.2 | 1.0 | +100 |
| Whole grains (oz)            | 3.4 | 1.4 | 7.9 | 2.4 | +132 |
| Refined grains (oz)          | 3.4 | 1.6 | 0.9 | 1.3 | -74  |
| Nuts and seeds (oz)          | 0.3 | 0.5 | 1.0 | 1.0 | +233 |
| Nut and seed butters (oz)    | 0.5 | 0.8 | 0.4 | 0.8 | -20  |
| Dairy (cups)                 | 3.1 | 0.5 | 0.3 | 0.4 | -90  |
| Eggs (oz)                    | 0.7 | 0.7 | 0.0 | 0.0 | -100 |
| Poultry (oz)                 | 0.4 | 1.2 | 0.0 | 0.0 | -100 |
| Seafood (oz)                 | 1.2 | 1.6 | 0.0 | 0.0 | -100 |
| Red meat (oz)                | 1.2 | 1.4 | 0.0 | 0.0 | -100 |
| Meat alternatives (oz)       | 0.4 | 1.1 | 2.5 | 3.8 | +525 |
| <b>HEI-2015 Score</b>        | 100 | --  | 88  | --  | -12  |

<sup>1</sup> Meal plans were generated and theoretical food and nutrient levels were calculated for both diets. Results from WFPB and vegan diets were virtually identical. For those items in which the standard deviation is 50% of the point estimate or more, we examined the median difference with similar findings (data not shown).

<sup>2</sup> Intakes are standardized to 2000 kcal

<sup>3</sup> MP=MyPlate; % difference (greater or lesser) was calculated as % difference = (diet value / MyPlate value)\*100 – 100.

**Table S3.** Estimated Nutrient Levels and % Differences of Vegan<sup>1,2</sup> Meal Plans Compared to MyPlate<sup>2</sup>.

|                          | <b>MyPlate</b> |           | <b>Vegan</b> |           | <b>% diff vs. MP<sup>3</sup></b> |
|--------------------------|----------------|-----------|--------------|-----------|----------------------------------|
|                          | <b>Mean</b>    | <b>SD</b> | <b>Mean</b>  | <b>SD</b> |                                  |
| <b>Energy (kcal)</b>     | 2000           | --        | 2000         | --        | --                               |
| <b>Fat (g)</b>           | 64             | 11        | 39           | 13        | -39                              |
| Total fat (% energy)     | 29             | 5         | 17           | 6         | -39                              |
| Saturated fat (% energy) | 8              | 2         | 3            | 1         | -66                              |
| MUFA (% energy)          | 11             | 2         | 6            | 3         | -44                              |
| PUFA (% energy)          | 8              | 2         | 7            | 2         | -19                              |
| Unsat:sat fat ratio      | 3              | 1         | 5            | 1         | +92                              |
| <b>CHO (g)</b>           | 272            | 29        | 363          | 34        | +33                              |
| CHO (% energy)           | 54             | 6         | 73           | 7         | +33                              |
| Added sugars (g)         | 26             | 15        | 9            | 9         | -66                              |
| Added sugars (% energy)  | 6              | 3         | 2            | 2         | -66                              |
| <b>Protein (g)</b>       | 96             | 11        | 81           | 11        | -16                              |
| Protein (% energy)       | 19             | 2         | 16           | 2         | -16                              |

|                                                 |      |     |      |      |        |
|-------------------------------------------------|------|-----|------|------|--------|
| Animal protein (% energy)                       | 12   | 2   | 0    | 0    | -100   |
| Plant protein (% energy)                        | 7    | 1   | 16   | 2    | +126   |
| <b>Fiber (g)</b>                                | 28   | 5   | 70   | 8    | +147   |
| <b>Micronutrients</b>                           |      |     |      |      |        |
| Dietary Vitamin A Activity (RAE, µg)            | 1344 | 703 | 1859 | 1073 | +38    |
| Total Vitamin D <sup>4</sup> (calciferol, µg)   | 10   | 5   | 27   | 14   | +169   |
| Dietary Vitamin D <sup>5</sup> (calciferol, µg) | 10   | 5   | 1    | 1    | -91    |
| Dietary Vitamin E (Alpha-Tocopherol mg)         | 15   | 5   | 20   | 5    | +35    |
| Total Vitamin B12 <sup>4</sup> (µg)             | 6    | 3   | 880  | 265  | +13964 |
| Dietary Vitamin B12 <sup>6</sup> (µg)           | 6    | 3   | 2    | 4    | -61    |
| Dietary folate equivalents (µg)                 | 458  | 135 | 965  | 275  | +110   |
| Dietary vitamin C (mg)                          | 134  | 64  | 244  | 147  | +82    |
| Dietary calcium (mg)                            | 1434 | 247 | 962  | 263  | -33    |
| Dietary magnesium(mg)                           | 419  | 59  | 716  | 77   | +71    |
| Dietary potassium (mg)                          | 4071 | 583 | 5402 | 1045 | +33    |
| Dietary iron (mg)                               | 15   | 4   | 26   | 4    | +81    |
| Dietary sodium (mg)                             | 2301 | 661 | 2743 | 899  | +19    |

<sup>1</sup> Meal plans were generated and theoretical food and nutrient levels were calculated for both diets. Results from WFPB and vegan diets were virtually identical. For those items in which the standard deviation is 50% of the point estimate or more, we examined the median difference with similar findings (data not shown).

<sup>2</sup> Standardized to 2000 kcal.

<sup>3</sup> Percent difference was calculated as % difference = (diet value / recommended value)\*100 – 100.

<sup>4</sup> Total vitamin D and B12 includes that from foods (including fortified foods) and supplements. Dietary vitamin D and B12 includes only that from foods (including fortified foods).

<sup>5</sup> Median, quartile 1, and quartile 2 of dietary vitamin D were as follows: 0µg, 0µg, 2µg. Means are presented in the table to reflect adjustments made in absorption based on status.

<sup>6</sup> Median, quartile 1, and quartile 2 of dietary vitamin B12 were as follows: 1µg, 0µg, 2µg. Means are presented in the table to reflect adjustments made in absorption based on status.

**Table S4.** Estimated Levels of Nutrients of Public Health Concern and % Differences (Greater or Lesser) of Vegan Diets Compared to Recommendations.

| Men                         |                                                     |      |         |      |       | Women |           |      |          |      |       |      |
|-----------------------------|-----------------------------------------------------|------|---------|------|-------|-------|-----------|------|----------|------|-------|------|
|                             | RDA                                                 | Diff | EAR     | Diff | AI    | Diff  | RDA       | Diff | EAR      | Diff | AI    | Diff |
| Vitamin A (µg)              | 900                                                 | +107 | 625     | +197 |       |       | 700       | +166 | 500      | +272 |       |      |
| Vitamin D <sup>2</sup> (µg) | 15                                                  | +80  | 10      | +170 |       |       | 15        | +80  | 10       | +170 |       |      |
| Vitamin E (mg)              | 15                                                  | +33  | 12      | +67  |       |       | 15        | +33  | 12       | +67  |       |      |
| Folate total (µg)           | 400                                                 | +141 | 320     | +202 |       |       | 400       | +141 | 320      | +202 |       |      |
| Vitamin C (mg)              | 90                                                  | +171 | 75      | +225 |       |       | 75        | +225 | 60       | +307 |       |      |
| Calcium <sup>3</sup> (mg)   | 1000                                                | -4*  | 800     | +20  |       |       | 1000-1200 | -20* | 800-1000 | -4*  |       |      |
| Magnesium <sup>4</sup> (mg) | 400-420                                             | +70  | 330-350 | +105 |       |       | 310-320   | +124 | 255-265  | +170 |       |      |
| Iron <sup>5</sup> (mg)      | 8                                                   | +225 | 6       | +333 |       |       | 8-18      | +44  | 8.1-5    | +221 |       |      |
| Potassium (g)               |                                                     |      |         |      | 4.7   | +15   |           |      |          |      | 4.7   | +15  |
| Fiber <sup>7</sup> (g)      |                                                     |      |         |      | 30-38 | +84   |           |      |          |      | 21-25 | +180 |
| Sodium (g)                  |                                                     |      |         |      | 2.3   | +19*  |           |      |          |      | 2.3   | +19* |
|                             | Dietary Guidelines for Americans<br>(men and women) |      |         |      |       |       |           |      |          |      |       |      |
| Saturated fat (% kcal)      | <10%                                                |      | -70     |      |       |       |           |      |          |      |       |      |
| Added sugar (% kcal)        | <10%                                                |      | -80     |      |       |       |           |      |          |      |       |      |

<sup>1</sup> Recommended levels applied to all men and women except where noted. The highest recommended level for a subgroup was used for comparison. % difference was calculated as: % difference = (meal plan value / recommended value) \* 100 – 100.

<sup>2</sup> Total vitamin D (both food and supplements)

<sup>3</sup> Comparison applies to all men and women ages 51-70y (RDA 1,200 mg/d; EAR 1,000 mg/d)

<sup>4</sup> Comparison applies to all men ages 31-70y (RDA 420 mg/d; EAR 350 mg/d) and women ages 31-70y (RDA 320 mg/d; 265 mg/d)

<sup>5</sup> Comparison applies to all men (RDA 8mg/d; EAR 6 mg/d) and women ages 19-50y (RDA 18mg/d; EAR 8.1 mg/d)

<sup>6</sup> Estimated Average Requirement (EAR) for vitamins A, D, E, C, folate, calcium, magnesium, iron; Adequate Intake (AI) for potassium and fiber; Upper Limit (UL) for sodium; and Dietary Guidelines for Americans recommended limits for saturated fat and added sugar

<sup>7</sup> Comparison applies to men and women ages 19-50y (men: 38 g/d; women: 25g/d)

\* Does not meet recommendations

**Table S5.** Medians and Interquartile Ranges for Mean Nutrient Intakes from MyPlate, WFPB, and Vegan Meal Plans<sup>1,2</sup>.

|                                     | MyPlate     |           |           | WFPB         |           |           | Vegan        |           |           |
|-------------------------------------|-------------|-----------|-----------|--------------|-----------|-----------|--------------|-----------|-----------|
|                                     | Medi        | Q1        | Q3        | Media        | Q1        | Q3        | Media        | Q1        | Q3        |
| <b>Food Group Servings</b>          |             |           |           |              |           |           |              |           |           |
| Total vegetables (cup)              | 2.5         | 1.8       | 3.3       | 6.3          | 5.3       | 9.1       | 6.3          | 5.3       | 8.7       |
| Green leafy vegetables              | 0.8         | 0.0       | 1.2       | 2.5          | 1.2       | 3.2       | 2.5          | 1.5       | 3.3       |
| Legumes (cup)                       | 0.4         | 0.0       | 0.8       | 2.9          | 1.7       | 3.5       | 3.1          | 1.7       | 4.0       |
| Whole fruits (cup)                  | 0.9         | 0.7       | 1.5       | 2.1          | 1.4       | 2.6       | 2.1          | 1.4       | 2.6       |
| Whole grains (oz)                   | 3.1         | 2.6       | 3.8       | 7.1          | 6.1       | 10.0      | 7.1          | 6.1       | 10.7      |
| Refined grains (oz)                 | 3.5         | 2.3       | 4.4       | 0.2          | 0.0       | 1.3       | 0.2          | 0.0       | 0.9       |
| Nuts and seeds (oz)                 | 0.0         | 0.0       | 0.3       | 0.7          | 0.3       | 1.0       | 0.7          | 0.3       | 1.5       |
| Nut and seed butters (oz)           | 0.0         | 0.0       | 0.9       | 0.0          | 0.0       | 0.4       | 0.0          | 0.0       | 0.4       |
| Dairy (cups)                        | 3.1         | 2.9       | 3.4       | 0.1          | 0.0       | 0.8       | 0.1          | 0.0       | 0.5       |
| Eggs (oz)                           | 0.5         | 0.0       | 1.1       | 0.0          | 0.0       | 0.0       | 0.0          | 0.0       | 0.0       |
| Poultry (oz)                        | 0.0         | 0.0       | 0.0       | 0.0          | 0.0       | 0.0       | 0.0          | 0.0       | 0.0       |
| Seafood (oz)                        | 0.0         | 0.0       | 2.6       | 0.0          | 0.0       | 0.0       | 0.0          | 0.0       | 0.0       |
| Red meat (oz)                       | 0.9         | 0.0       | 2.5       | 0.0          | 0.0       | 0.0       | 0.0          | 0.0       | 0.0       |
| Meat alternatives (oz)              | 0.0         | 0.0       | 0.0       | 1.3          | 0.0       | 4.0       | 1.8          | 0.0       | 4.0       |
| <b>Nutrients</b>                    | <b>Medi</b> | <b>Q1</b> | <b>Q3</b> | <b>Media</b> | <b>Q1</b> | <b>Q3</b> | <b>Media</b> | <b>Q1</b> | <b>Q3</b> |
| <b>Energy (kcal)</b>                | --          | --        | --        | --           | --        | --        | --           | --        | --        |
| <b>Fat (g)</b>                      | 64          | 57        | 70        | 35           | 31        | 43        | 35           | 31        | 42        |
| Total fat (% energy)                | 29          | 26        | 31        | 16           | 14        | 19        | 16           | 14        | 19        |
| Saturated fat (% energy)            | 8           | 6         | 9         | 2            | 2         | 3         | 2            | 2         | 3         |
| MUFA (% energy)                     | 10          | 10        | 12        | 5            | 3         | 8         | 5            | 4         | 8         |
| PUFA <sup>3</sup> (% energy)        | 8           | 6         | 10        | 6            | 5         | 7         | 6            | 5         | 7         |
| Ratio unsat:sat fat                 | 2           | 2         | 3         | 5            | 4         | 6         | 5            | 4         | 6         |
| <b>CHO (g)</b>                      | 272         | 257       | 289       | 374          | 361       | 386       | 373          | 361       | 380       |
| CHO (% energy)                      | 54          | 51        | 58        | 75           | 72        | 77        | 75           | 72        | 76        |
| Added sugars (g)                    | 26          | 15        | 31        | 5            | 1         | 17        | 5            | 1         | 13        |
| Added sugars (% energy)             | 6           | 4         | 8         | 1            | 0         | 4         | 1            | 0         | 3         |
| <b>Protein (g)</b>                  | 96          | 89        | 102       | 81           | 76        | 86        | 81           | 75        | 85        |
| Protein (% energy)                  | 19          | 18        | 20        | 16           | 15        | 17        | 16           | 15        | 17        |
| Animal protein (%)                  | 11          | 10        | 13        | 0            | 0         | 0         | 0            | 0         | 0         |
| Plant protein (% energy)            | 7           | 6         | 8         | 16           | 15        | 17        | 16           | 15        | 17        |
| <b>Fiber (g)</b>                    | 28          | 26        | 31        | 69           | 63        | 76        | 69           | 63        | 76        |
| <b>Micronutrients</b>               |             |           |           |              |           |           |              |           |           |
| Total Vitamin A Activity            | 1216        | 820       | 1700      | 1612         | 996       | 2285      | 1680         | 996       | 2164      |
| Total Vitamin D <sup>3</sup>        | 9           | 7         | 10        | 25           | 24        | 29        | 25           | 25        | 29        |
| Dietary Vitamin D                   | 9           | 7         | 10        | 0            | 0         | 2         | 0            | 0         | 2         |
| Dietary Vitamin E                   | 14          | 12        | 16        | 21           | 15        | 22        | 21           | 15        | 22        |
| Total Vitamin B12 <sup>3</sup> (µg) | 6           | 5         | 6         | 994          | 979       | 999       | 993          | 962       | 999       |
| Dietary Vitamin B12                 | 6           | 5         | 6         | 1            | 0         | 2         | 1            | 0         | 2         |
| Dietary folate equivalents          | 464         | 355       | 512       | 1002         | 730       | 1143      | 1005         | 730       | 1143      |
| Dietary vitamin C (mg)              | 114         | 87        | 187       | 211          | 149       | 274       | 211          | 149       | 353       |
| Dietary calcium (mg)                | 1428        | 127       | 1613      | 999          | 719       | 1075      | 999          | 774       | 1084      |
| Total Magnesium <sup>2</sup> (mg)   | 395         | 376       | 444       | 709          | 657       | 780       | 710          | 659       | 803       |
| Dietary                             | 395         | 376       | 444       | 709          | 657       | 776       | 709          | 659       | 780       |
| Dietary Potassium (mg)              | 4056        | 361       | 4374      | 5131         | 4716      | 5678      | 5131         | 4716      | 5661      |
| Dietary Iron (mg)                   | 14          | 12        | 18        | 26           | 22        | 30        | 26           | 24        | 30        |
| Dietary Sodium (mg)                 | 2205        | 187       | 2852      | 2731         | 2069      | 3131      | 2731         | 2069      | 3108      |

<sup>1</sup> Meal plans were generated and theoretical food and nutrient levels were calculated for both diets.

<sup>2</sup> Intakes are standardized to 2000 kcal

<sup>3</sup> Total vitamin D and B12 includes that from foods (including fortified foods) and supplements. Dietary vitamin D and B12 includes only that from foods (including fortified foods).
